# Supplementary material
Source: PubMed Central journal article supplement (PMC6439597)
Supplement: jama-321-858-s004.pdf [file jama-321-858-s004.pdf]

# Data Sharing Statement

Bot. Effect of Multinutrient Supplementation and Food-Related Behavioral Activation Therapy on Prevention of Major Depressive Disorder Among Overweight or Obese Adults With Subsyndromal Depressive Symptoms. *JAMA*. Published March 05, 2019. 10.1001/jama.2019.0556

## Data

**Data available:** Yes

**Data types:** Other (please specify)

**Additional Information:** data collected for this study will be made available after approval of an analysis plan by the MoodFOOD trial publication committee.

**How to access data:** <https://www.moodfood-vu.eu/> or [moodfood.po@vu.nl](mailto:moodfood.po@vu.nl)

**When available:** With publication

## Supporting Documents

**Document types:** Other (please specify)

**Additional Information:** recruitment brochures

**How to access documents:** <https://www.moodfood-vu.eu/>

**When available:** With publication

## Additional Information

**Who can access the data:** researchers whose proposed use of the data has been approved

**Types of analyses:** for a specified purpose

**Mechanisms of data availability:** after approval of a proposal

**Any additional restrictions:** data can only be used for the analysis outlined in the approved analysis plan.
